# Supplementary material for: Sodium thiosulfate-assisted synthesis of NiS2nanostructure by using nickel(ii)-Salen precursor: optical and magnetic properties
Source: Royal Society of Chemistry journal article supplement (doi:10.1039/c4dt02232g), 2014-09-15
Supplement: c4dt02232g1.pdf [file c4dt02232g1.pdf]

## **Electronic supplementary information**

### **Sodium Thiosulfate-Assisted Synthesis of NiS<sub>2</sub> Nanostructure by Using Nickel(II)-Salen Precursor: optical and magnetic properties**

**Raziyeh Akbarzadeh, Hossein Dehghani\* , Fatemeh Behnoudnia**

Department of Inorganic Chemistry, Faculty of Chemistry, University of Kashan, Kashan, I. R. Iran. Fax: +0098 361 591 2397; Tel: +0098 361 591 2386; E-mail: dehghani@kashanu.ac.ir

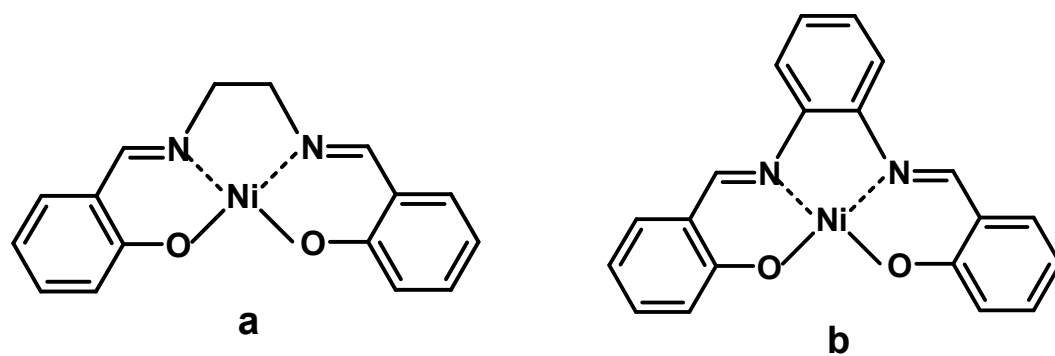

**Fig. S1** Structural formula of (a) Ni(II)- Salen and (b) Ni(II)- Salophen complexes.

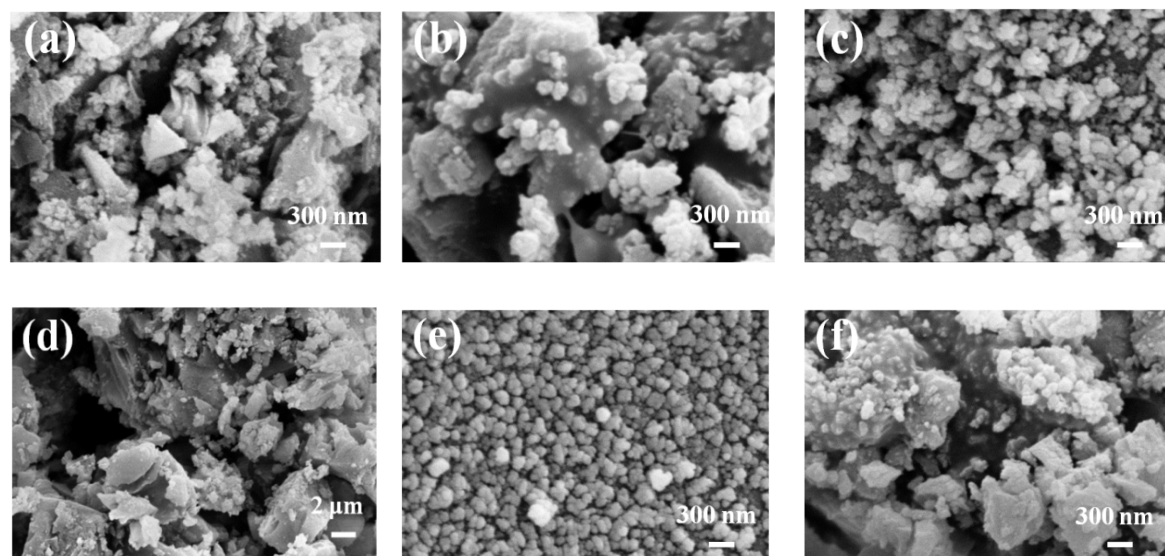

**Fig. S2** SEM images of the products synthesized by using Ni(II)-Salophen complex and  $\text{Na}_2\text{S}_2\text{O}_3$ , obtained at different conditions (a) S1, (b) S2, (c) S3, (d) S4, (e) S5 and (f) S6.

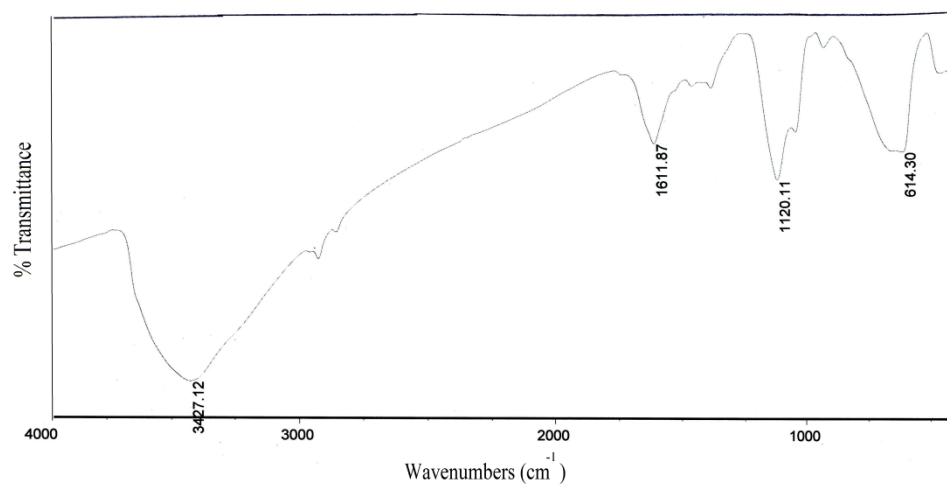

**Fig. S3** FT-IR spectrum of the product synthesized by using Ni(II)-Salophen complex and  $\text{Na}_2\text{S}_2\text{O}_3$  as the starting material (S8).
